# Supplementary material for: Congruence between patients’ preferred and perceived participation in medical decision-making: a review of the literature
Source: Springer Nature journal article supplement (doi:10.1186/1472-6947-14-25), 2014-04-03

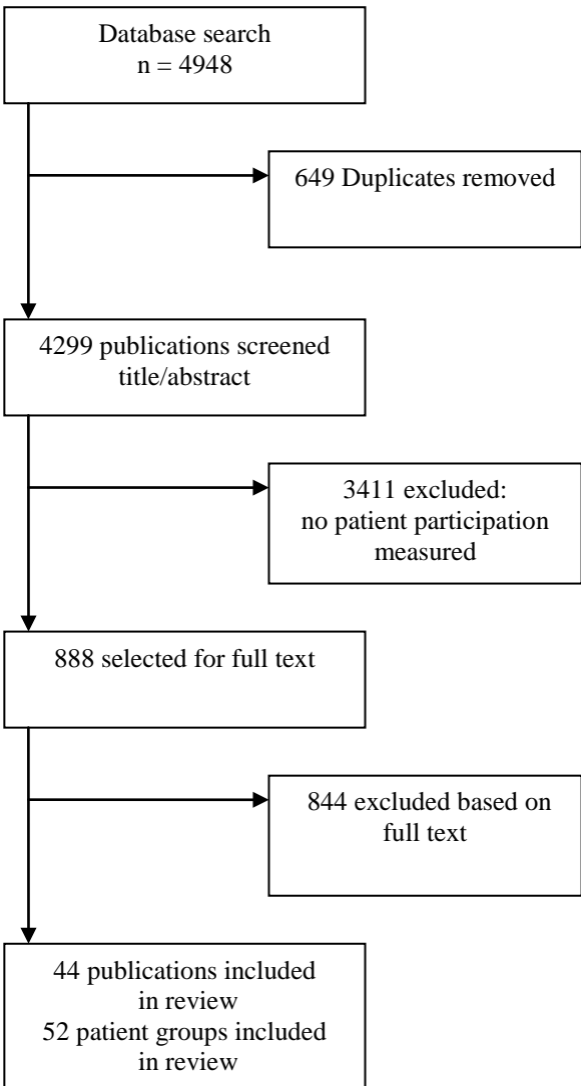

Supplement: 12911_2013_790_MOESM1_ESM.pdf [file 12911_2013_790_MOESM1_ESM.pdf]
